# Supplementary material
Source: PubMed Central journal article supplement (PMC1449668)
Supplement: pnas_0507947103_3.pdf [file pnas_0507947103_3.pdf]

**A**constitutive  
heterochromatintransitional  
heterochromatin

CEN chromatin

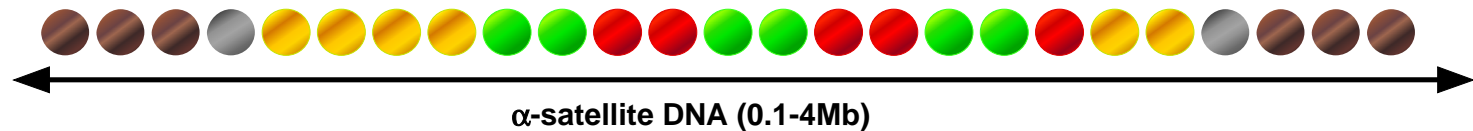**B**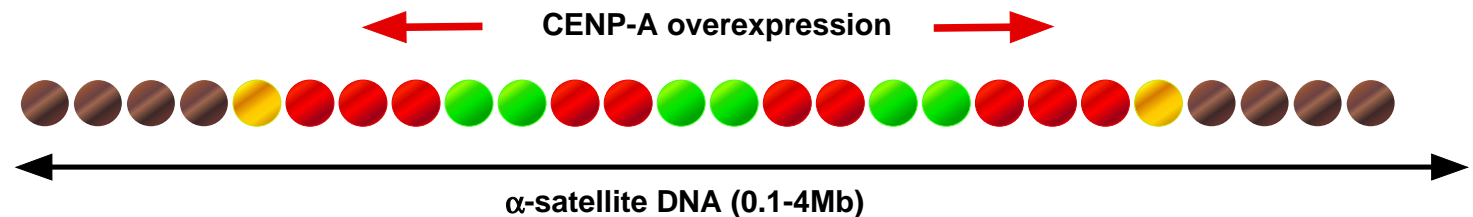 CENP-A H3K9me3 H3K27me H3K4me2 H3K9me2
