# Supplementary material
Source: PubMed Central journal article supplement (PMC1449668)

**A**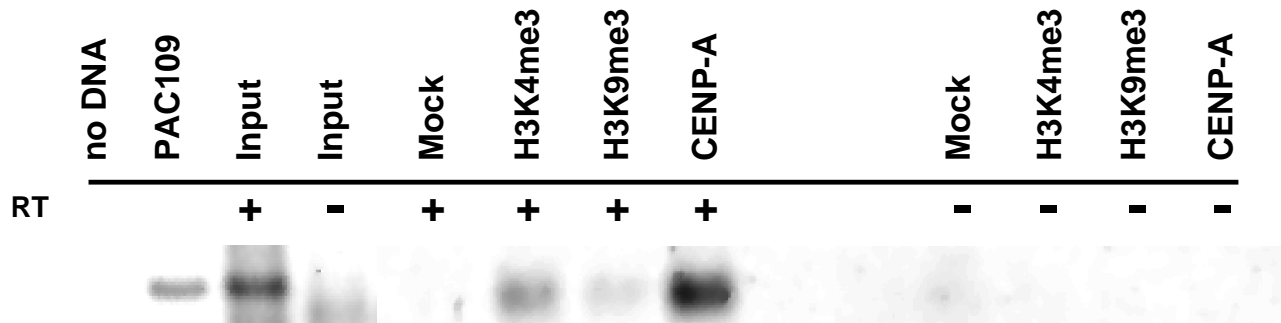**B**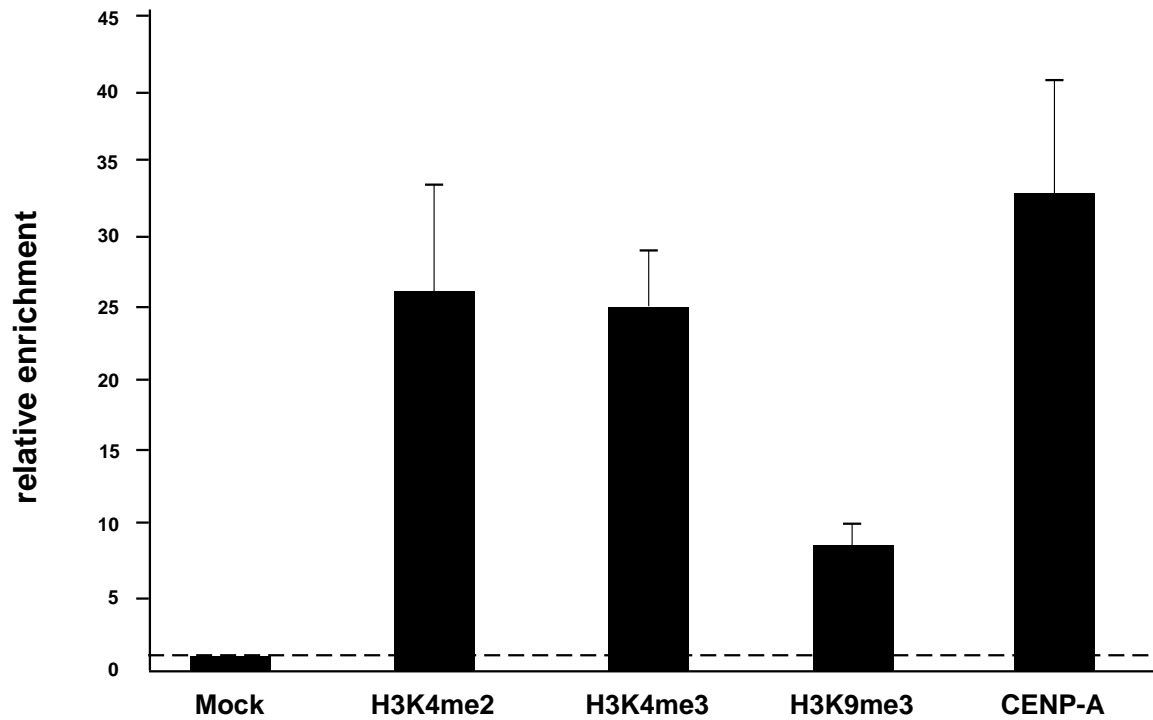

Supplement: pnas_0507947103_1.pdf [file pnas_0507947103_1.pdf]

**A**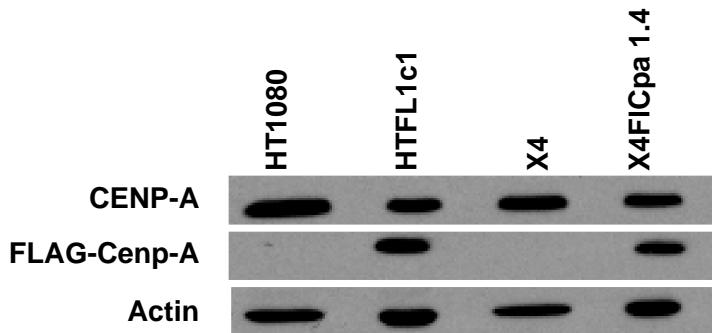**B**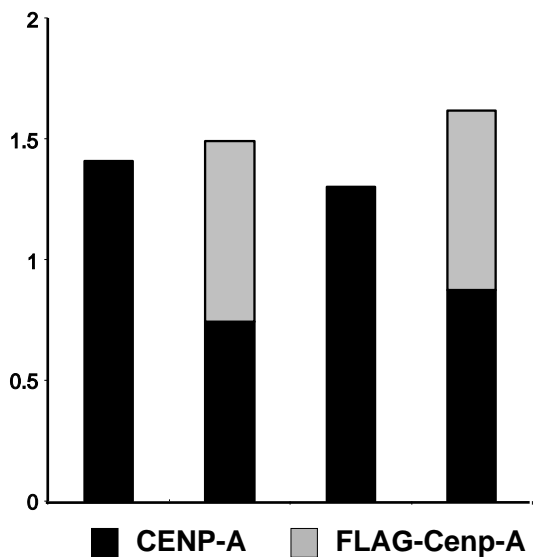

Supplement: pnas_0507947103_2.pdf [file pnas_0507947103_2.pdf]
